# Supplementary material for: In Silico Bioinformatics Analysis on the Role of Long Non-Coding RNAs as Drivers and Gatekeepers of Androgen-Independent Prostate Cancer Using LNCaP and PC-3 Cells
Source: MDPI journal article supplement (doi:10.3390/cimb45090459), 2023-09-01
Supplement: s1 [file s1]

Table S1: Layout of the PrimePCR array plate

|   | 1               | 2              | 3              | 4              | 5              | 6              | 7               | 8              | 9              | 10             | 11             | 12             | 13              | 14             | 15             | 16             | 17             | 18             | 19              | 20             | 21             | 22             | 23             | 24             |
|---|-----------------|----------------|----------------|----------------|----------------|----------------|-----------------|----------------|----------------|----------------|----------------|----------------|-----------------|----------------|----------------|----------------|----------------|----------------|-----------------|----------------|----------------|----------------|----------------|----------------|
| A | PCGE M1         | SOCS 2-AS1     | PCA3           | PRNC R1        | CBR3-AS1       | PCAT 29        | PCGE M1         | SOCS 2-AS1     | PCA3           | PRNC R1        | CBR3-AS1       | PCAT 29        | PCGE M1         | SOCS 2-AS1     | PCA3           | PRNC R1        | CBR3-AS1       | PCAT 29        | PCGE M1         | SOCS 2-AS1     | PCA3           | PRNC R1        | CBR3-AS1       | PCAT 29        |
| B | RP1-30M3.6      | GNP1-2-AS1     | LINC00493      | RP11-619J2 0.1 | RP4-635E1 8.8  | HMGN 3-AS1     | RP1-30M3.6      | GNP1-2-AS1     | LINC00493      | RP11-619J2 0.1 | RP4-635E1 8.8  | HMGN 3-AS1     | RP1-30M3.6      | GNP1-2-AS1     | LINC00493      | RP11-619J2 0.1 | RP4-635E1 8.8  | HMGN 3-AS1     | RP1-30M3.6      | GNP1-2-AS1     | LINC00493      | RP11-619J2 0.1 | RP4-635E1 8.8  | HMGN 3-AS1     |
| C | RN7SL 15P       | AC003 075.4    | RP11-884K1 0.6 | RP11-390P2 .4  | TP53T G1       | RP11-382A2 0.4 | RN7SL 15P       | AC003 075.4    | RP11-884K1 0.6 | RP11-390P2 .4  | TP53T G1       | RP11-382A2 0.4 | RN7SL 15P       | AC003 075.4    | RP11-884K1 0.6 | RP11-390P2 .4  | TP53T G1       | RP11-382A2 0.4 | RN7SL 15P       | AC003 075.4    | RP11-884K1 0.6 | RP11-390P2 .4  | TP53T G1       | RP11-382A2 0.4 |
| D | KRT81           | RP4-724E1 6.2  | KB-1562D 12.2  | TERC           | RP11-545E1 7.3 | CFLA R-AS1     | KRT81           | RP4-724E1 6.2  | KB-1562D 12.2  | TERC           | RP11-545E1 7.3 | CFLA R-AS1     | KRT81           | RP4-724E1 6.2  | KB-1562D 12.2  | TERC           | RP11-545E1 7.3 | CFLA R-AS1     | KRT81           | RP4-724E1 6.2  | KB-1562D 12.2  | TERC           | RP11-545E1 7.3 | CFLA R-AS1     |
| E | RP3-443C4.2     | FGD5-AS1       | SNHG 8         | RP11-556O9 .2  | KCNQ 10T1      | TINCR          | RP3-443C4.2     | FGD5-AS1       | SNHG 8         | RP11-556O9 .2  | KCNQ 10T1      | TINCR          | RP3-443C4.2     | FGD5-AS1       | SNHG 8         | RP11-556O9 .2  | KCNQ 10T1      | TINCR          | RP3-443C4.2     | FGD5-AS1       | SNHG 8         | RP11-556O9 .2  | KCNQ 10T1      | TINCR          |
| F | SNHG 19         | RP11-379H1 8.1 | RP11-759F5.1   | Inc-FAM8 3G-3  | XIST           | RNF1 39-AS1    | SNHG 19         | RP11-379H1 8.1 | RP11-759F5.1   | Inc-FAM8 3G-3  | XIST           | RNF1 39-AS1    | SNHG 19         | RP11-379H1 8.1 | RP11-759F5.1   | Inc-FAM8 3G-3  | XIST           | RNF1 39-AS1    | SNHG 19         | RP11-379H1 8.1 | RP11-759F5.1   | Inc-FAM8 3G-3  | XIST           | RNF1 39-AS1    |
| G | AFG3L 1P        | LINC01024      | RP11-46C24 .7  | LINC00339      | RP11-48B3.3    | B2M            | AFG3L 1P        | LINC01024      | RP11-46C24 .7  | LINC00339      | RP11-48B3.3    | B2M            | AFG3L 1P        | LINC01024      | RP11-46C24 .7  | LINC00339      | RP11-48B3.3    | B2M            | AFG3L 1P        | LINC01024      | RP11-46C24 .7  | LINC00339      | RP11-48B3.3    | B2M            |
| H | AC006 994.1     | FOXP 4-AS1     | RP11-146E1 3.4 | MAGI 1-IT1     | RP4-591B8.2    | HMBS           | AC006 994.1     | FOXP 4-AS1     | RP11-146E1 3.4 | MAGI 1-IT1     | RP4-591B8.2    | HMBS           | AC006 994.1     | FOXP 4-AS1     | RP11-146E1 3.4 | MAGI 1-IT1     | RP4-591B8.2    | HMBS           | AC006 994.1     | FOXP 4-AS1     | RP11-146E1 3.4 | MAGI 1-IT1     | RP4-591B8.2    | HMBS           |
| I | PCAT1           | HOTAIR         | LINC00657      | PTPR J-AS1     | SCHL AP1       | TBP            | PCAT1           | HOTAIR         | LINC00657      | PTPR J-AS1     | SCHL AP1       | TBP            | PCAT1           | HOTAIR         | LINC00657      | PTPR J-AS1     | SCHL AP1       | TBP            | PCAT1           | HOTAIR         | LINC00657      | PTPR J-AS1     | SCHL AP1       | TBP            |
| J | RP3-523E1 9.2   | COX6 CP10      | CTD-2562J 17.7 | CTA-363E1 9.2  | WAC-AS1        | PAQ1           | RP3-523E1 9.2   | COX6 CP10      | CTD-2562J 17.7 | CTA-363E1 9.2  | WAC-AS1        | PAQ1           | RP3-523E1 9.2   | COX6 CP10      | CTD-2562J 17.7 | CTA-363E1 9.2  | WAC-AS1        | PAQ1           | RP3-523E1 9.2   | COX6 CP10      | CTD-2562J 17.7 | CTA-363E1 9.2  | WAC-AS1        | PAQ1           |
| K | RP11-121A1 4.2  | RP11-226L1 5.5 | RP11-174G6 .5  | RP11-4731.5    | RP11-156E6.1   | PAQ2           | RP11-121A1 4.2  | RP11-226L1 5.5 | RP11-174G6 .5  | RP11-4731.5    | RP11-156E6.1   | PAQ2           | RP11-121A1 4.2  | RP11-226L1 5.5 | RP11-174G6 .5  | RP11-4731.5    | RP11-156E6.1   | PAQ2           | RP11-121A1 4.2  | RP11-226L1 5.5 | RP11-174G6 .5  | RP11-4731.5    | RP11-156E6.1   | PAQ2           |
| L | RP11-196G1 8.22 | BCDIN 3D-AS1   | GTF3 AP2       | RN7S L277P     | RP11-338I21 .1 | gDNA           | RP11-196G1 8.22 | BCDIN 3D-AS1   | GTF3 AP2       | RN7S L277P     | RP11-338I21 .1 | gDNA           | RP11-196G1 8.22 | BCDIN 3D-AS1   | GTF3 AP2       | RN7S L277P     | RP11-338I21 .1 | gDNA           | RP11-196G1 8.22 | BCDIN 3D-AS1   | GTF3 AP2       | RN7S L277P     | RP11-338I21 .1 | gDNA           |
| M | RP11-119B1 6.2  | LURA P1L-AS1   | DUTP 1         | UBA6-AS1       | CTD-2339M 3.1  | PCR            | RP11-119B1 6.2  | LURA P1L-AS1   | DUTP 1         | UBA6-AS1       | CTD-2339M 3.1  | PCR            | RP11-119B1 6.2  | LURA P1L-AS1   | DUTP 1         | UBA6-AS1       | CTD-2339M 3.1  | PCR            | RP11-119B1 6.2  | LURA P1L-AS1   | DUTP 1         | UBA6-AS1       | CTD-2339M 3.1  | PCR            |
| N | RP11-67L2.2     | RP11-363E7 .4  | FAM8 3H-AS1    | LINC01137      | CTD-3157E 16.1 | RQ1            | RP11-67L2.2     | RP11-363E7 .4  | FAM8 3H-AS1    | LINC01137      | CTD-3157E 16.1 | RQ1            | RP11-67L2.2     | RP11-363E7 .4  | FAM8 3H-AS1    | LINC01137      | CTD-3157E 16.1 | RQ1            | RP11-67L2.2     | RP11-363E7 .4  | FAM8 3H-AS1    | LINC01137      | CTD-3157E 16.1 | RQ1            |
| O | NHS-AS1         | AC009 404.2    | TUG1           | AC005 618.6    | PSMD 6-AS2     | RQ2            | NHS-AS1         | AC009 404.2    | TUG1           | AC005 618.6    | PSMD 6-AS2     | RQ2            | NHS-AS1         | AC009 404.2    | TUG1           | AC005 618.6    | PSMD 6-AS2     | RQ2            | NHS-AS1         | AC009 404.2    | TUG1           | AC005 618.6    | PSMD 6-AS2     | RQ2            |
| P | CTD-2010I1 6.1  | ZNF76 7P       | RP11-98I9.4    | RP11-244F1 2.3 | NRSN 2-AS1     | RT             | CTD-2010I1 6.1  | ZNF76 7P       | RP11-98I9.4    | RP11-244F1 2.3 | NRSN 2-AS1     | RT             | CTD-2010I1 6.1  | ZNF76 7P       | RP11-98I9.4    | RP11-244F1 2.3 | NRSN 2-AS1     | RT             | CTD-2010I1 6.1  | ZNF76 7P       | RP11-98I9.4    | RP11-244F1 2.3 | NRSN 2-AS1     | RT             |
